# Supplementary material
Source: Springer Nature journal article supplement (https://www.springermedizin.de/resource/supplementary/12882_2014_800_MOESM4_ESM.pdf/9454316)

**A**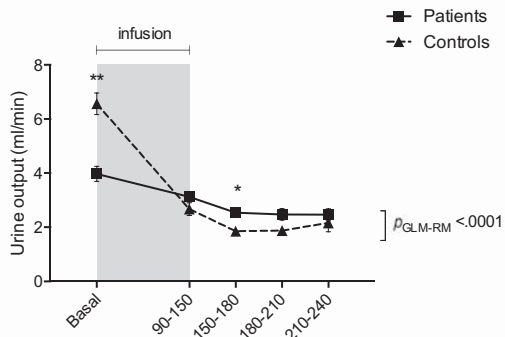**B**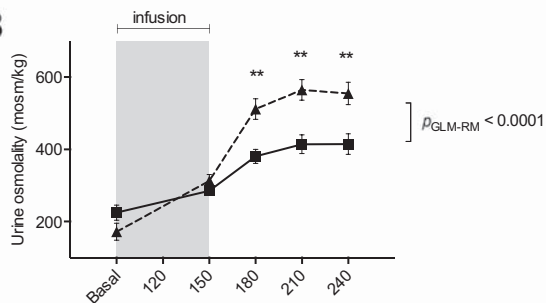**C**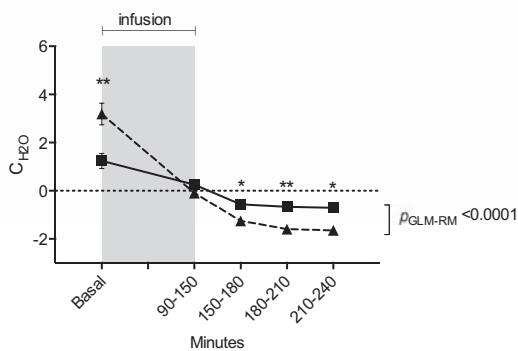**D**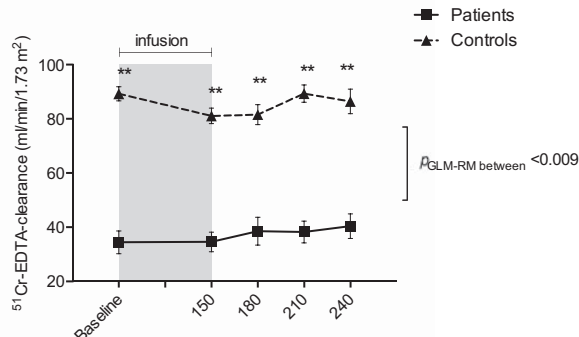**E**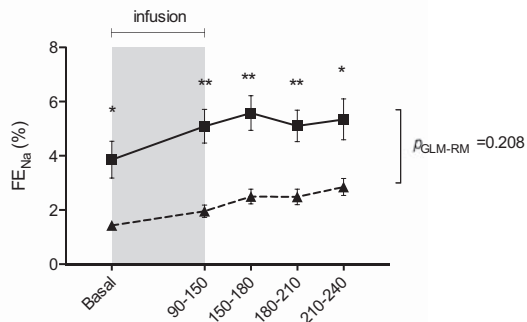**F**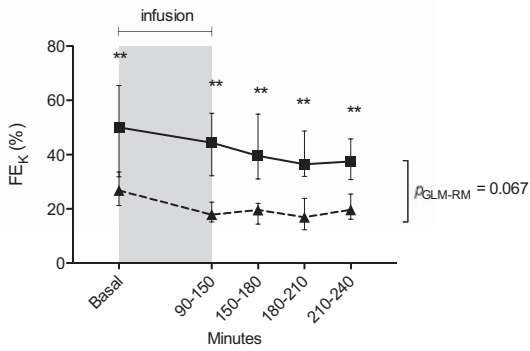

Supplement: MOESM4 [file 9454316]
